# Supplementary material
Source: PubMed Central journal article supplement (PMC8722450)
Supplement: NIHMS1685838-supplement-1.pdf [file NIHMS1685838-supplement-1.pdf]

**A Predicted population coverage (PPC) value of human CD8<sup>+</sup> T cell epitopes**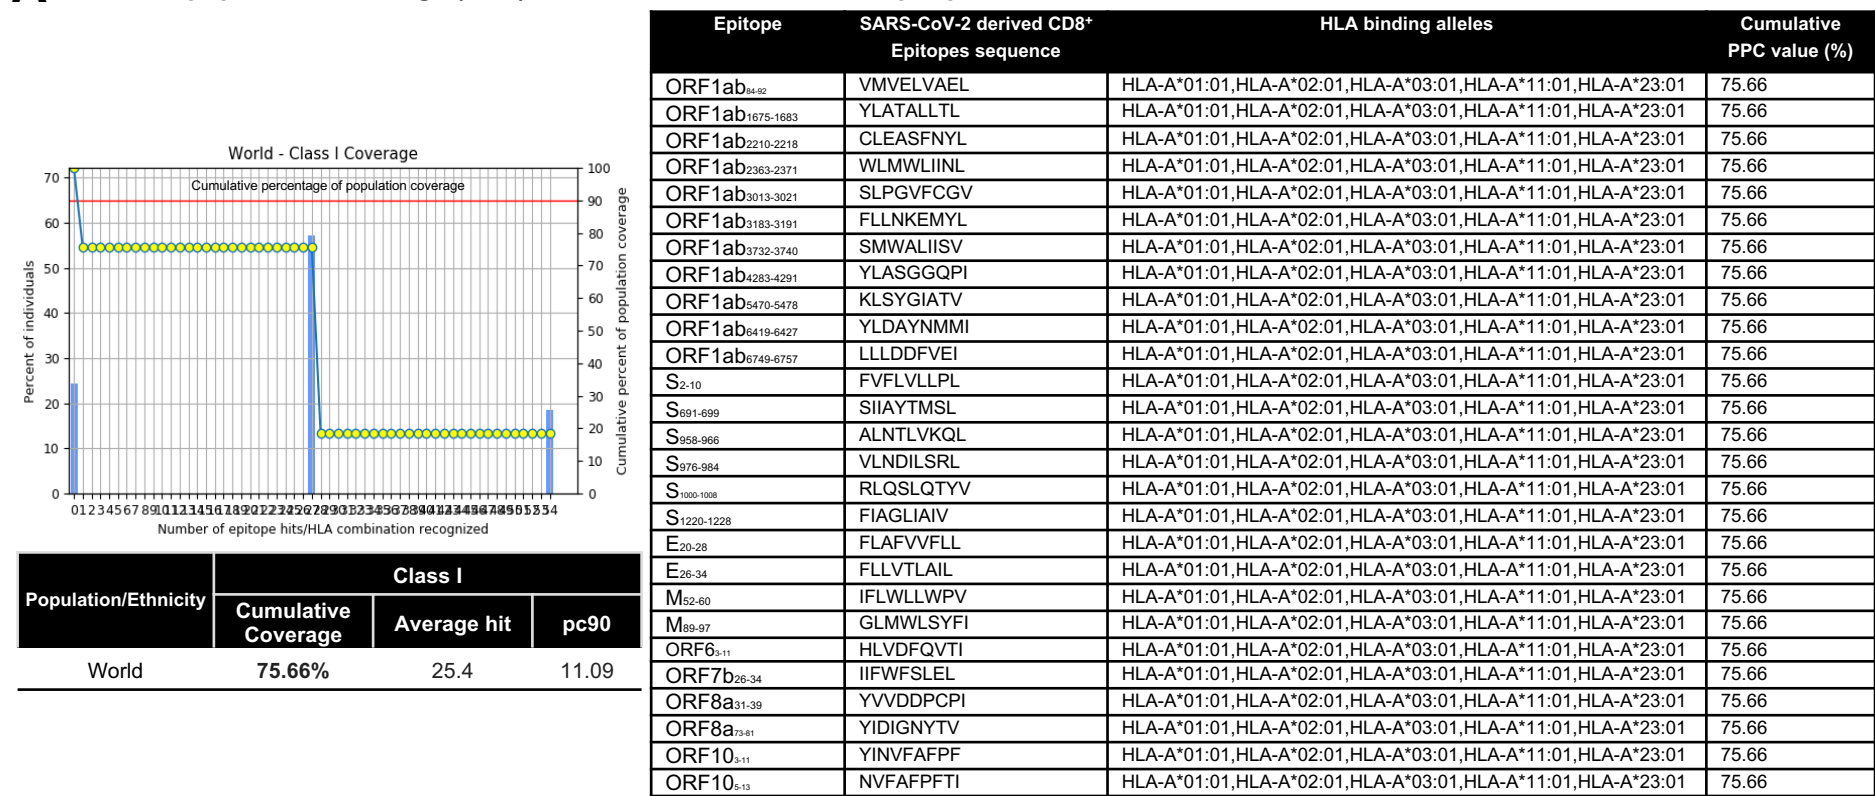**B Predicted population coverage (PPC) value of human CD4<sup>+</sup> T cell epitopes**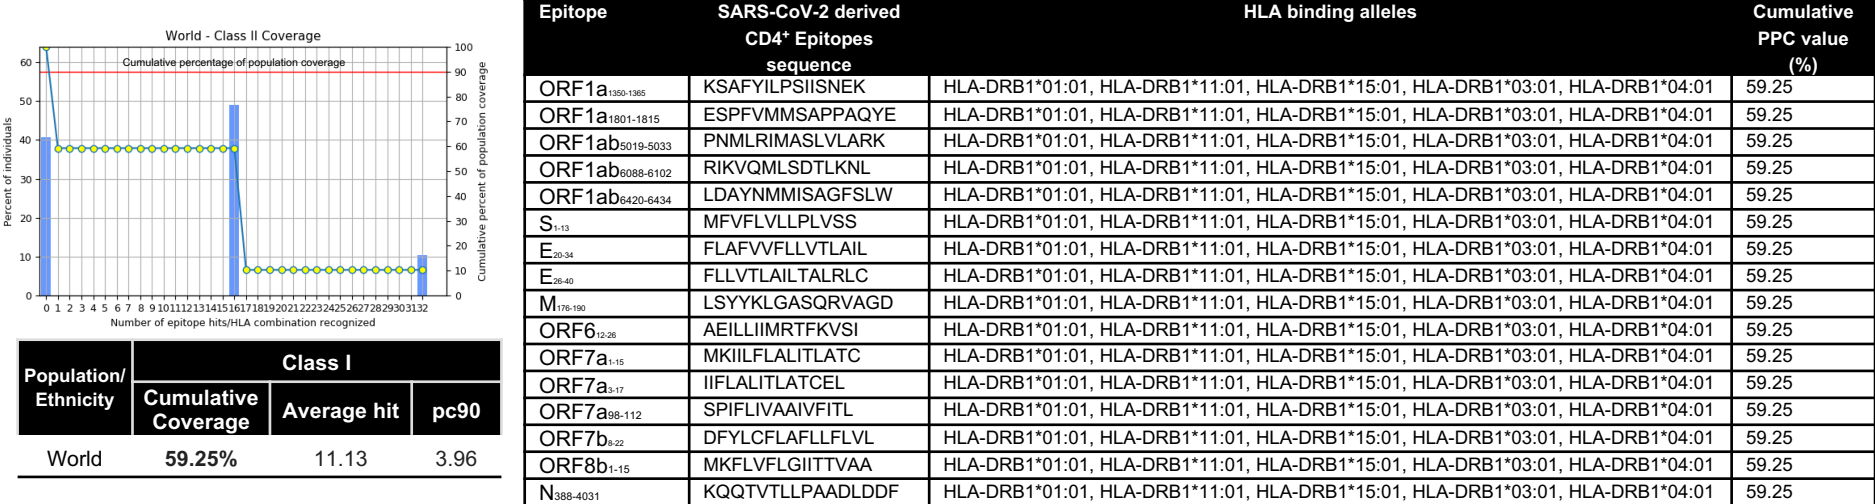**C Predicted population coverage (PPC) value of human CD8<sup>+</sup> T cell epitopes in Pan-Coronavirus Vaccine candidate # 1**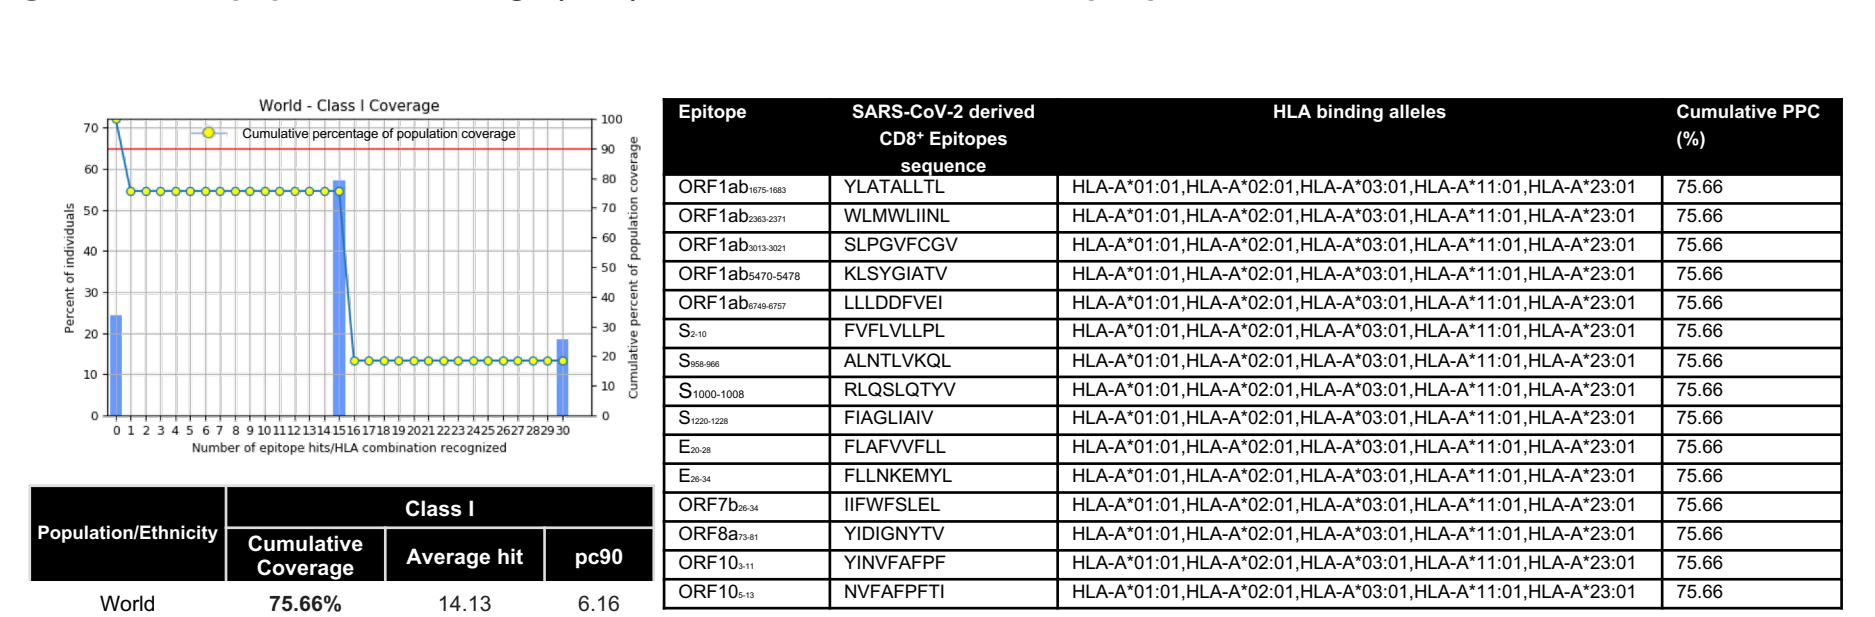**D Predicted population coverage (PPC) value of human CD4<sup>+</sup> T cell epitopes in Pan-Coronavirus Vaccine candidate # 1**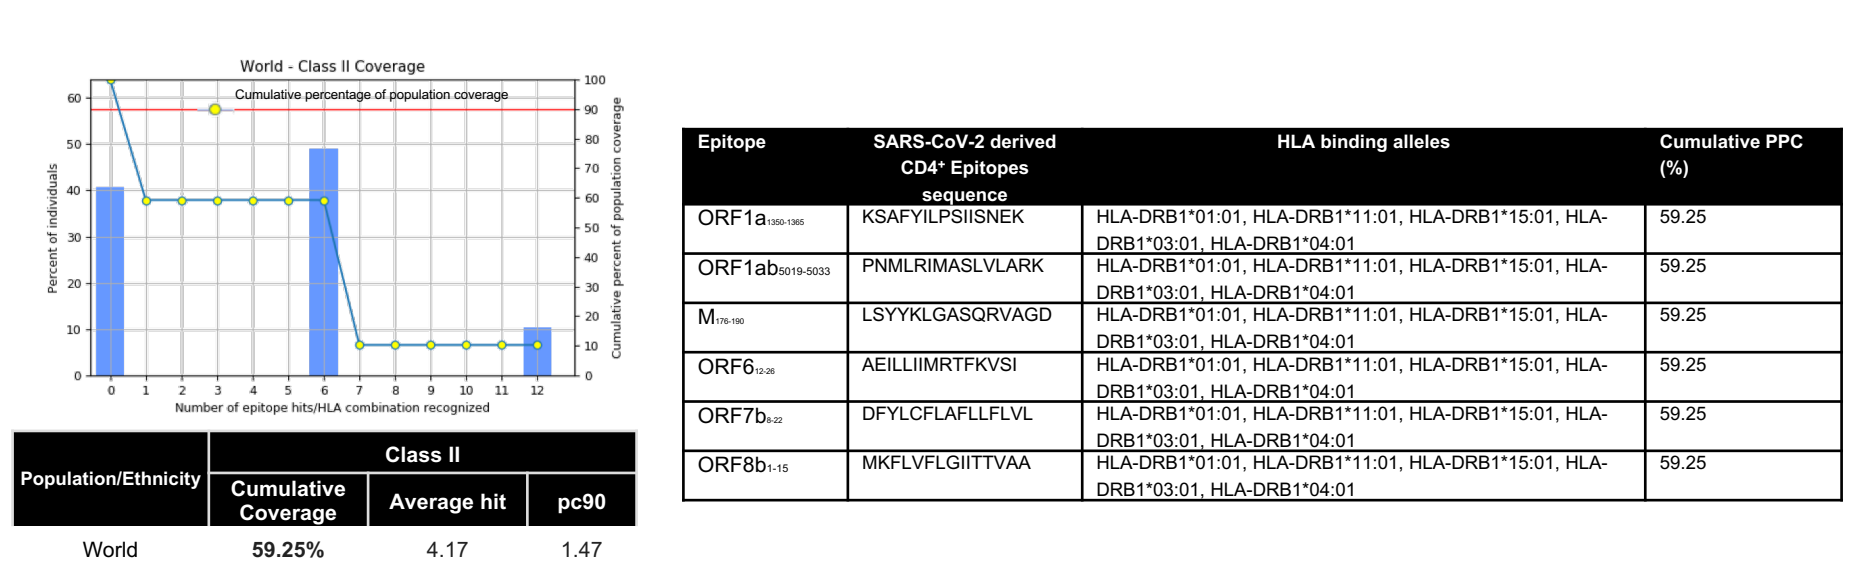

**Supplemental Figure S1: Population coverage calculation for all the high binding CD8<sup>+</sup> and CD4<sup>+</sup> T cell epitopes screened in the current study:** (A) The SARS-CoV-2-derived CD8<sup>+</sup> T cell epitopes are screened based on their presence among most frequently observed HLA-A alleles in global population (HLA-A\*01:01, HLA-A\*02:01, HLA-A\*03:01, HLA-A\*11:01, HLA-A\*23:01). MHC-I binding affinity and high degree of immunogenicity showed high PPC value of 75.66%, average number of epitope hits / HLA combinations recognized by the population is 25.4, and minimum number of epitope hits / HLA combinations recognized by 90% of the population (pc90) is 11.09 (B) The SARS-CoV-2-derived CD4<sup>+</sup> T cell epitopes are screened based on their presence among most frequently observed HLA-DRB1 alleles in global population (HLA-DRB1\*01:01, HLA-DRB1\*11:01, HLA-DRB1\*15:01, HLA-DRB1\*03:01, HLA-DRB1\*04:01). MHC-II binding affinity and high degree of immunogenicity showed high PPC values at 59.25%, average number of epitope hits / HLA combinations recognized by the population is 11.13, and minimum number of epitope hits / HLA combinations recognized by 90% of the population (pc90) is 3.96. The PPC plot shows percentage of individuals possessing combination of a number of epitopes/HLA alleles of interest and represents the cumulative percentage of population coverage. The line (-o-) shows the cumulative percentage of population coverage of epitope/HLA combination while the bars depict the population coverage for individual epitope. The analysis also generates the average number of epitope hits / HLA combinations recognized by the world population, and minimum number of epitope hits / HLA combinations recognized by 90% of the world population (pc90) as shown below the PPC plot. (C) The SARS-CoV-2-derived CD8<sup>+</sup> T cell epitopes are screened based on their presence among most frequently observed HLA-A alleles in global population (HLA-A\*01:01, HLA-A\*02:01, HLA-A\*03:01, HLA-A\*11:01, HLA-A\*23:01). MHC-I binding affinity and high degree of immunogenicity showed high PPC value of 75.66%, average number of epitope hits / HLA combinations recognized by the population is 14.13, and minimum number of epitope hits / HLA combinations recognized by 90% of the population (pc90) is 6.16. (D) The SARS-CoV-2-derived CD4<sup>+</sup> T cell epitopes are screened based on their presence among most frequently observed HLA-DRB1 alleles in global population (HLA-DRB1\*01:01, HLA-DRB1\*11:01, HLA-DRB1\*15:01, HLA-DRB1\*03:01, HLA-DRB1\*04:01). MHC-II binding affinity and high degree of immunogenicity showed high PPC value at 59.25%, average number of epitope hits / HLA combinations recognized by the population is 4.17, and minimum number of epitope hits / HLA combinations recognized by 90% of the population (pc90) is 1.47. The PPC plot shows percentage of individuals possessing combination of a number of epitopes/HLA alleles of interest and represents the cumulative percentage of population coverage. The line (-o-) shows the cumulative percentage of population coverage of epitope/HLA combination while the bars depict the population coverage for individual epitope. The analysis also generates the average number of epitope hits / HLA combinations recognized by the world population, and minimum number of epitope hits / HLA combinations recognized by 90% of the world population (pc90) as shown below the PPC plot.

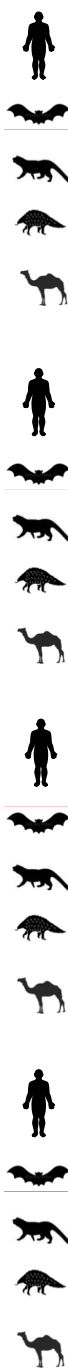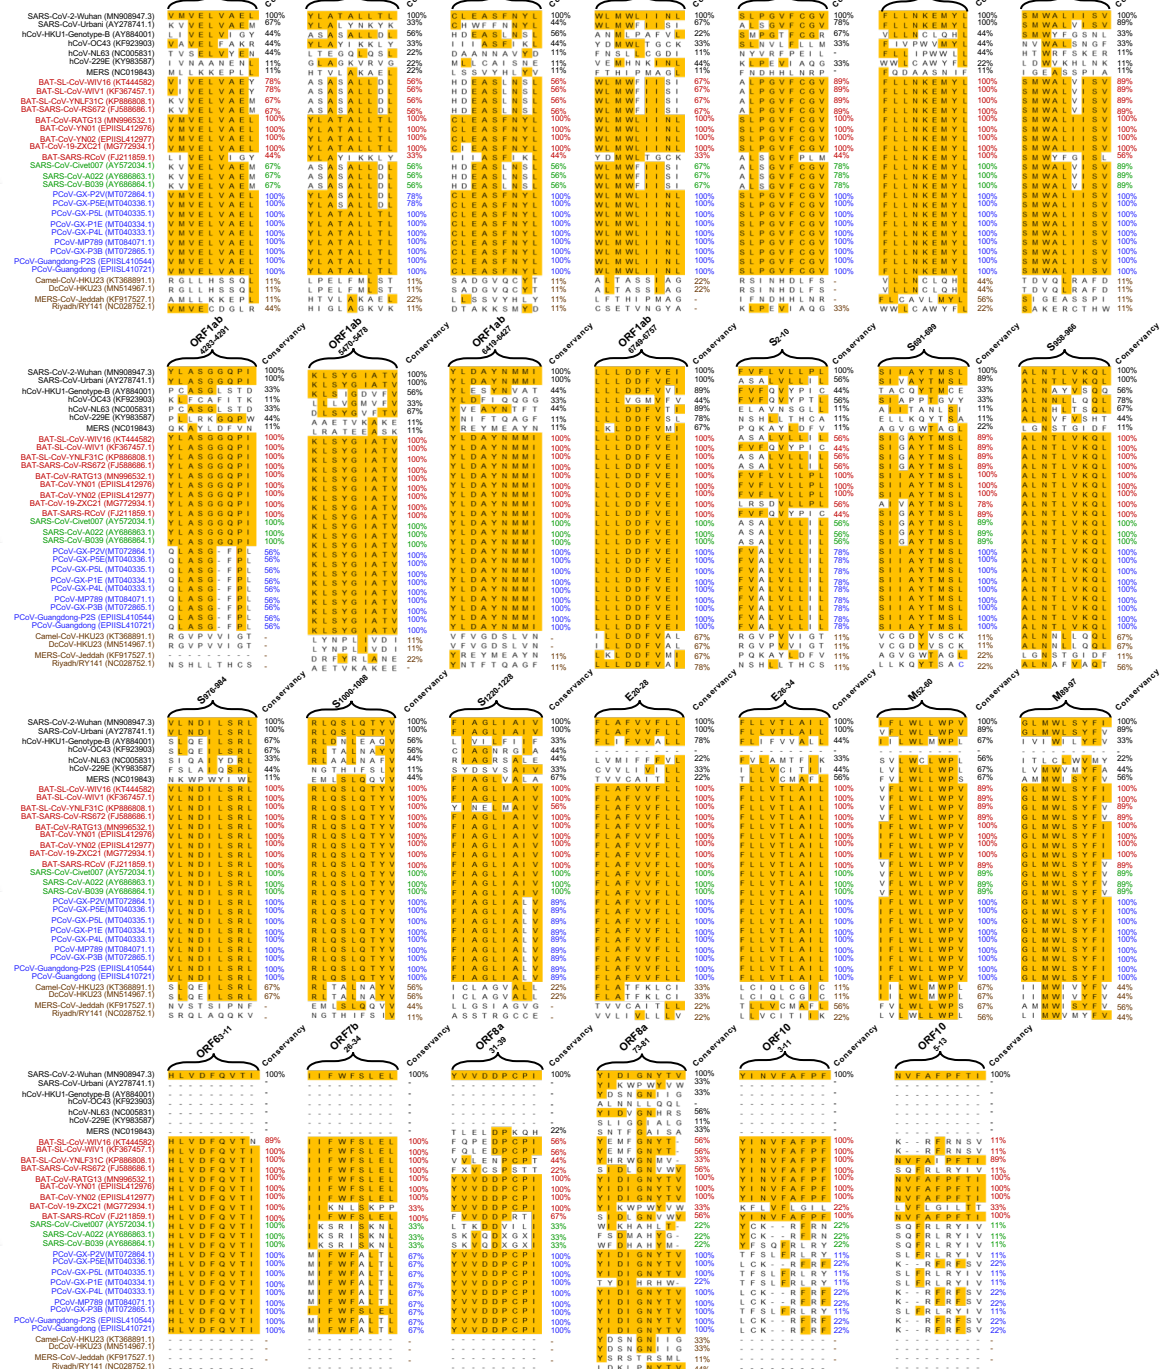

**Supplemental Figure S2: Sequence homology analysis to screen conservancy of potential SARS-CoV-2-derived human CD8+ T cell epitopes:** Shown are the comparison of sequence homology for the potential CD8+ T cell epitopes among 81,963 SARS-CoV-2 strains (that currently circulate in 190 countries on 6 continents), the 4 major “common cold” Coronaviruses that caused previous outbreaks (i.e. hCoV-OC43, hCoV-229E, hCoV-HKU1-Genotype B, and hCoV-NL63), and the SL-CoVs that were isolated from bats, civet cats, pangolins and camels. Epitope sequences highlighted in yellow present a high degree of homology among the currently circulating 81,963 SARS-CoV-2 strains and at least a 50% conservancy among two or more humans SARS-CoV strains from previous outbreaks, and the SL-CoV strains isolated from bats, civet cats, pangolins and camels, as described in *Materials and Methods*. *Homo Sapiens- black*, bats (*Rhinolophus affinis*, *Rhinolophus malayanus -red*), pangolins (*Manis javanica-blue*), civet cats (*Paguma larvata-green*), and camels (*Camelus dromedaries-brown*).

**A**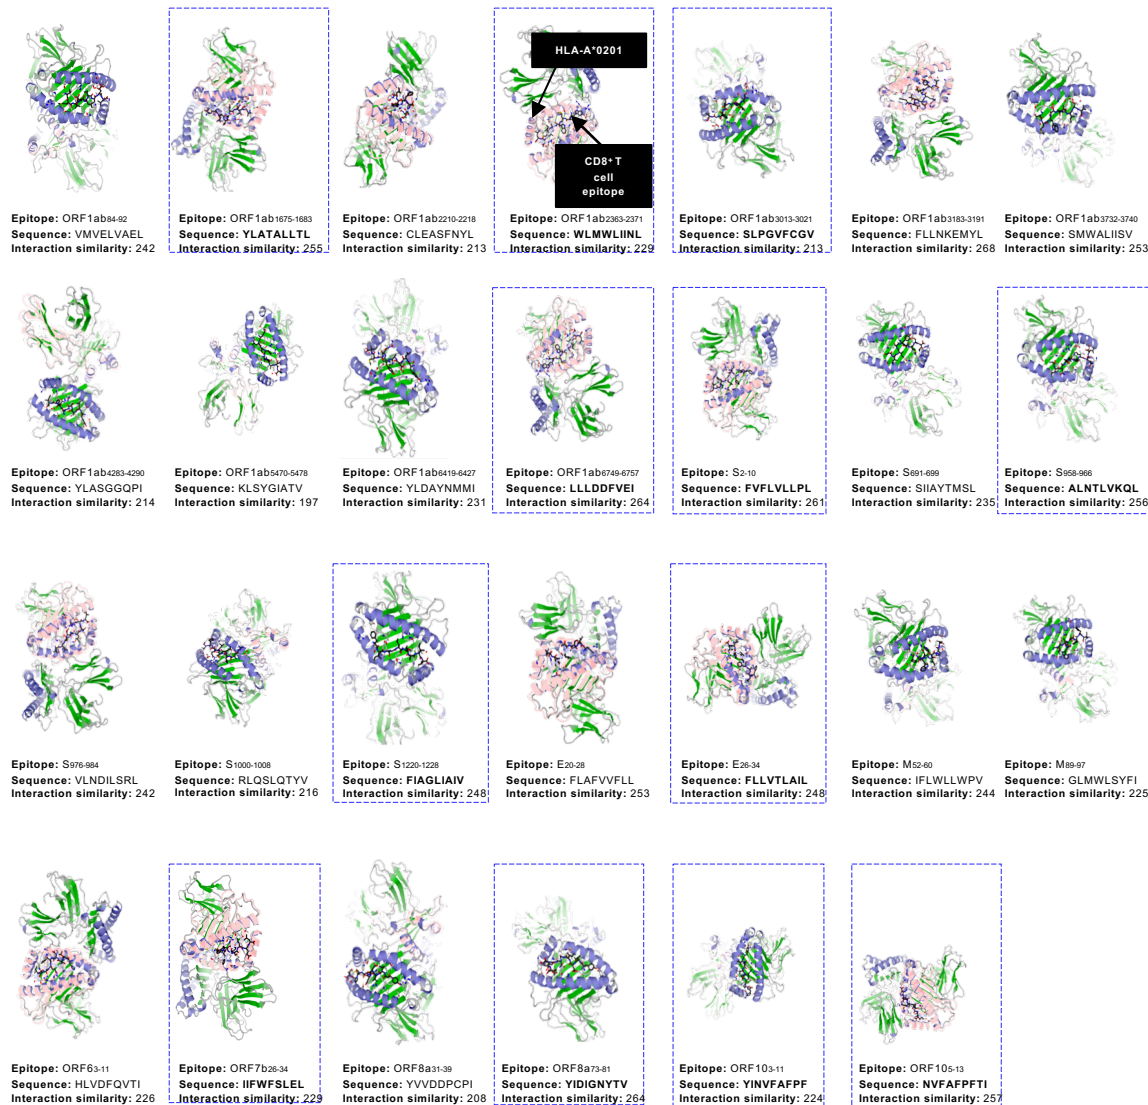

  In blue CD8<sup>+</sup> cell epitopes included in Pan-Coronavirus vaccine candidate #1

**B**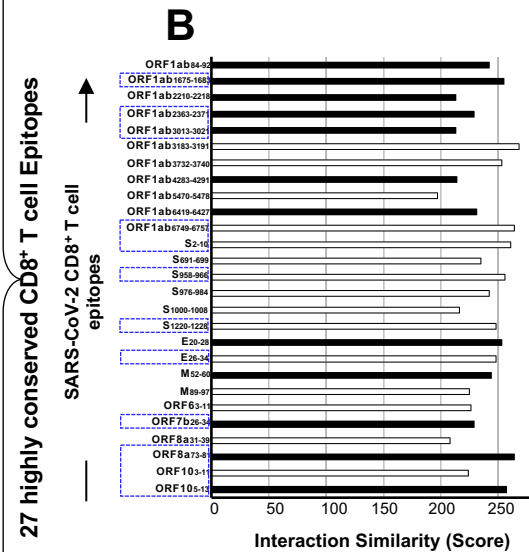

**Supplemental Figure S3: Docking of highly conserved SARS-CoV-2-derived human CD8<sup>+</sup> T cell epitopes to HLA-A\*02:01 molecules: (A)** Docking of the 27 high-affinity CD8<sup>+</sup> T cell binder peptides to the groove of HLA-A\*02:01 molecules. **(B)** Summary of the interaction similarity scores of the 27 high-affinity CD8<sup>+</sup> T cell epitope peptides to HLA-A\*02:01 molecules determined by protein-peptide molecular docking analysis. Black columns depict CD8<sup>+</sup> T cell epitope peptides with high interaction similarity scores.

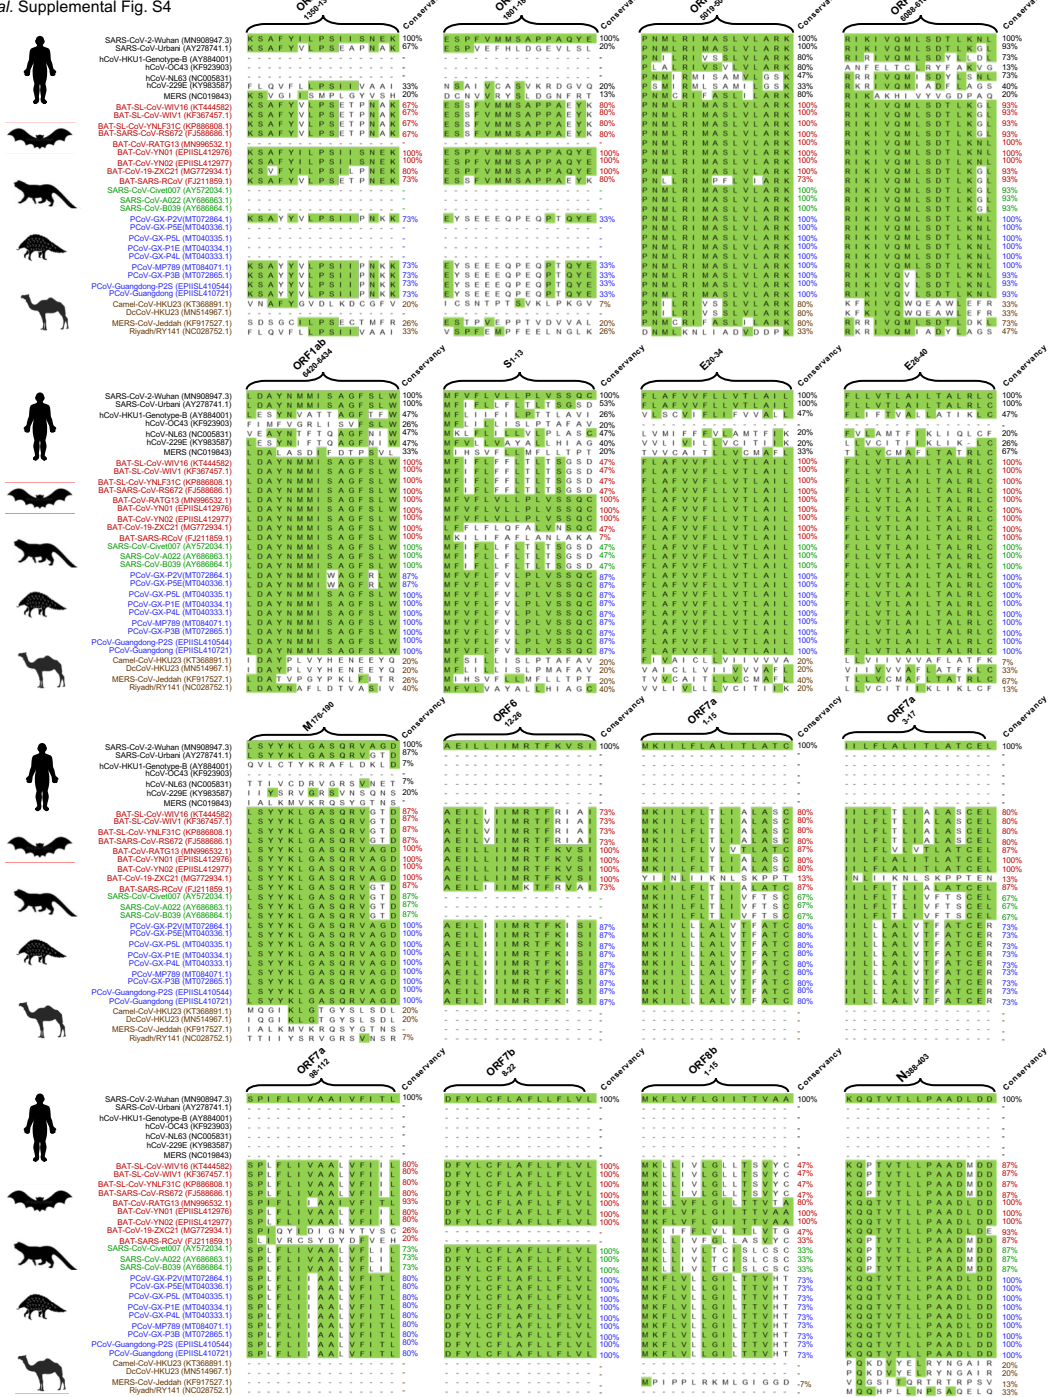

**Supplemental Figure S4: Identification of highly conserved potential SARS-CoV-2-derived human CD4<sup>+</sup> T cell epitopes that bind with high affinity to HLA-DR molecules:** Out of a total of 9,594 potential HLA-DR-restricted CD4<sup>+</sup> T cell epitopes from the whole genome sequence of SARS-CoV-2-Wuhan-Hu-1 strain (MN908947.3), 16 epitopes that bind with high affinity to HLA-DRB1 molecules were selected. The conservancy of the 16 CD4<sup>+</sup> T cell epitopes was analyzed among human and animal Coronaviruses. Shown are the comparison of sequence homology for the 16 CD4<sup>+</sup> T cell epitopes among 81,963 SARS-CoV-2 strains (that currently circulate in 6 continents), the 4 major “common cold” Coronaviruses that caused previous outbreaks (i.e. hCoV-OC43, hCoV-229E, hCoV-HKU1, and hCoV-NL63), and the SL-CoVs that were isolated from bats, civet cats, pangolins and camels. Epitope sequences highlighted in green present high degree of homology among the currently circulating 81,963 SARS-CoV-2 strains and at least a 50% conservancy among two or more humans SARS-CoV strains from previous outbreaks, and the SL-CoV strains isolated from bats, pangolins and camels, as described in *Materials and Methods*. *Homo Sapiens-black*, *Rhinolophus affinis*, *Rhinolophus malayanus -red*, pangolins (*Manis javanica-blue*), civet cats (*Paguma larvata-green*), and camels (*Camelus dromedaries-brown*).

A

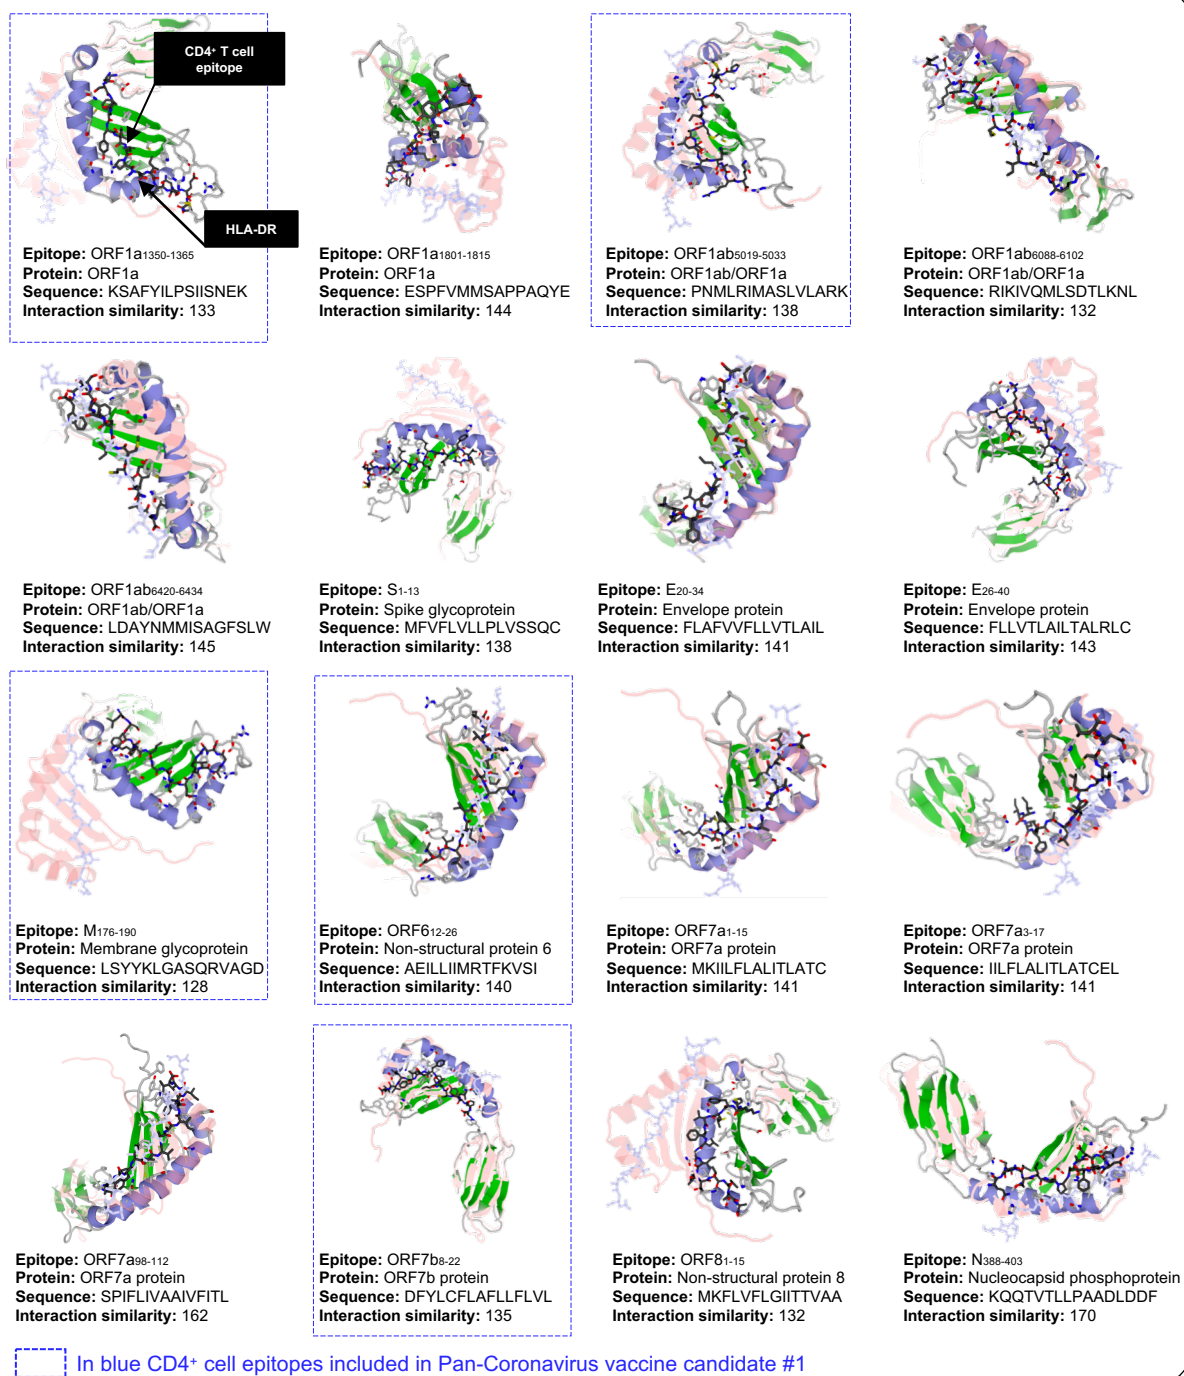

B

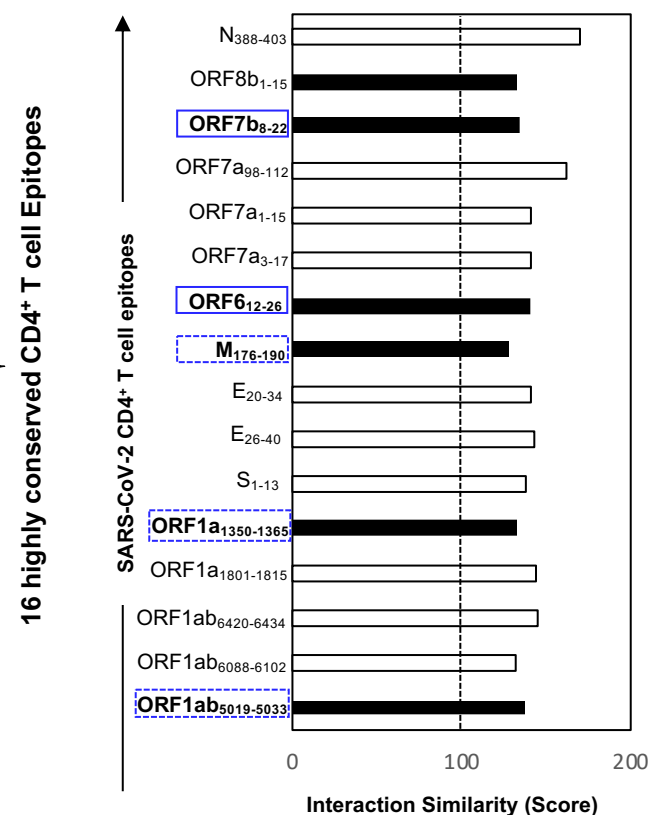

### Supplemental Figure S5: Molecular docking of highly conserved SARS-CoV-2 CD4<sup>+</sup> T cell epitopes to HLA-DRB1 molecules:

(A) Molecular docking of 16 CD4<sup>+</sup> T cell epitopes, conserved among human SARS-CoV-2 strains, previous humans SARS/MERS-CoV and bat SL-CoVs into the groove of the HLA-DRB1 protein crystal structure (PDB accession no: 4UQ3) was determined using the GalaxyPepDock server. The 16 CD4<sup>+</sup> T cell epitopes are promiscuous restricted to HLA-DRB1\*01:01, HLA-DRB1\*11:01, HLA-DRB1\*15:01, HLA-DRB1\*03:01 and HLA-DRB1\*04:01 alleles. The CD4<sup>+</sup> T cell peptides are shown in ball and stick structures, and the HLA-DRB1 protein crystal structure is shown as a template. The prediction accuracy is estimated from a linear model as the relationship between the fraction of correctly predicted binding site residues and the template-target similarity measured by the protein structure similarity score (TM score) and interaction similarity score ( $S_{\text{Inter}}$ ) obtained by linear regression.  $S_{\text{Inter}}$  shows the similarity of the amino acids of the CD8<sup>+</sup> T cell peptides aligned to the contacting residues in the amino acids of the HLA-DRB1 template structure. (B) Histograms representing interaction similarity score of CD4<sup>+</sup> T cells specific epitopes observed from the protein-peptide molecular docking analysis.

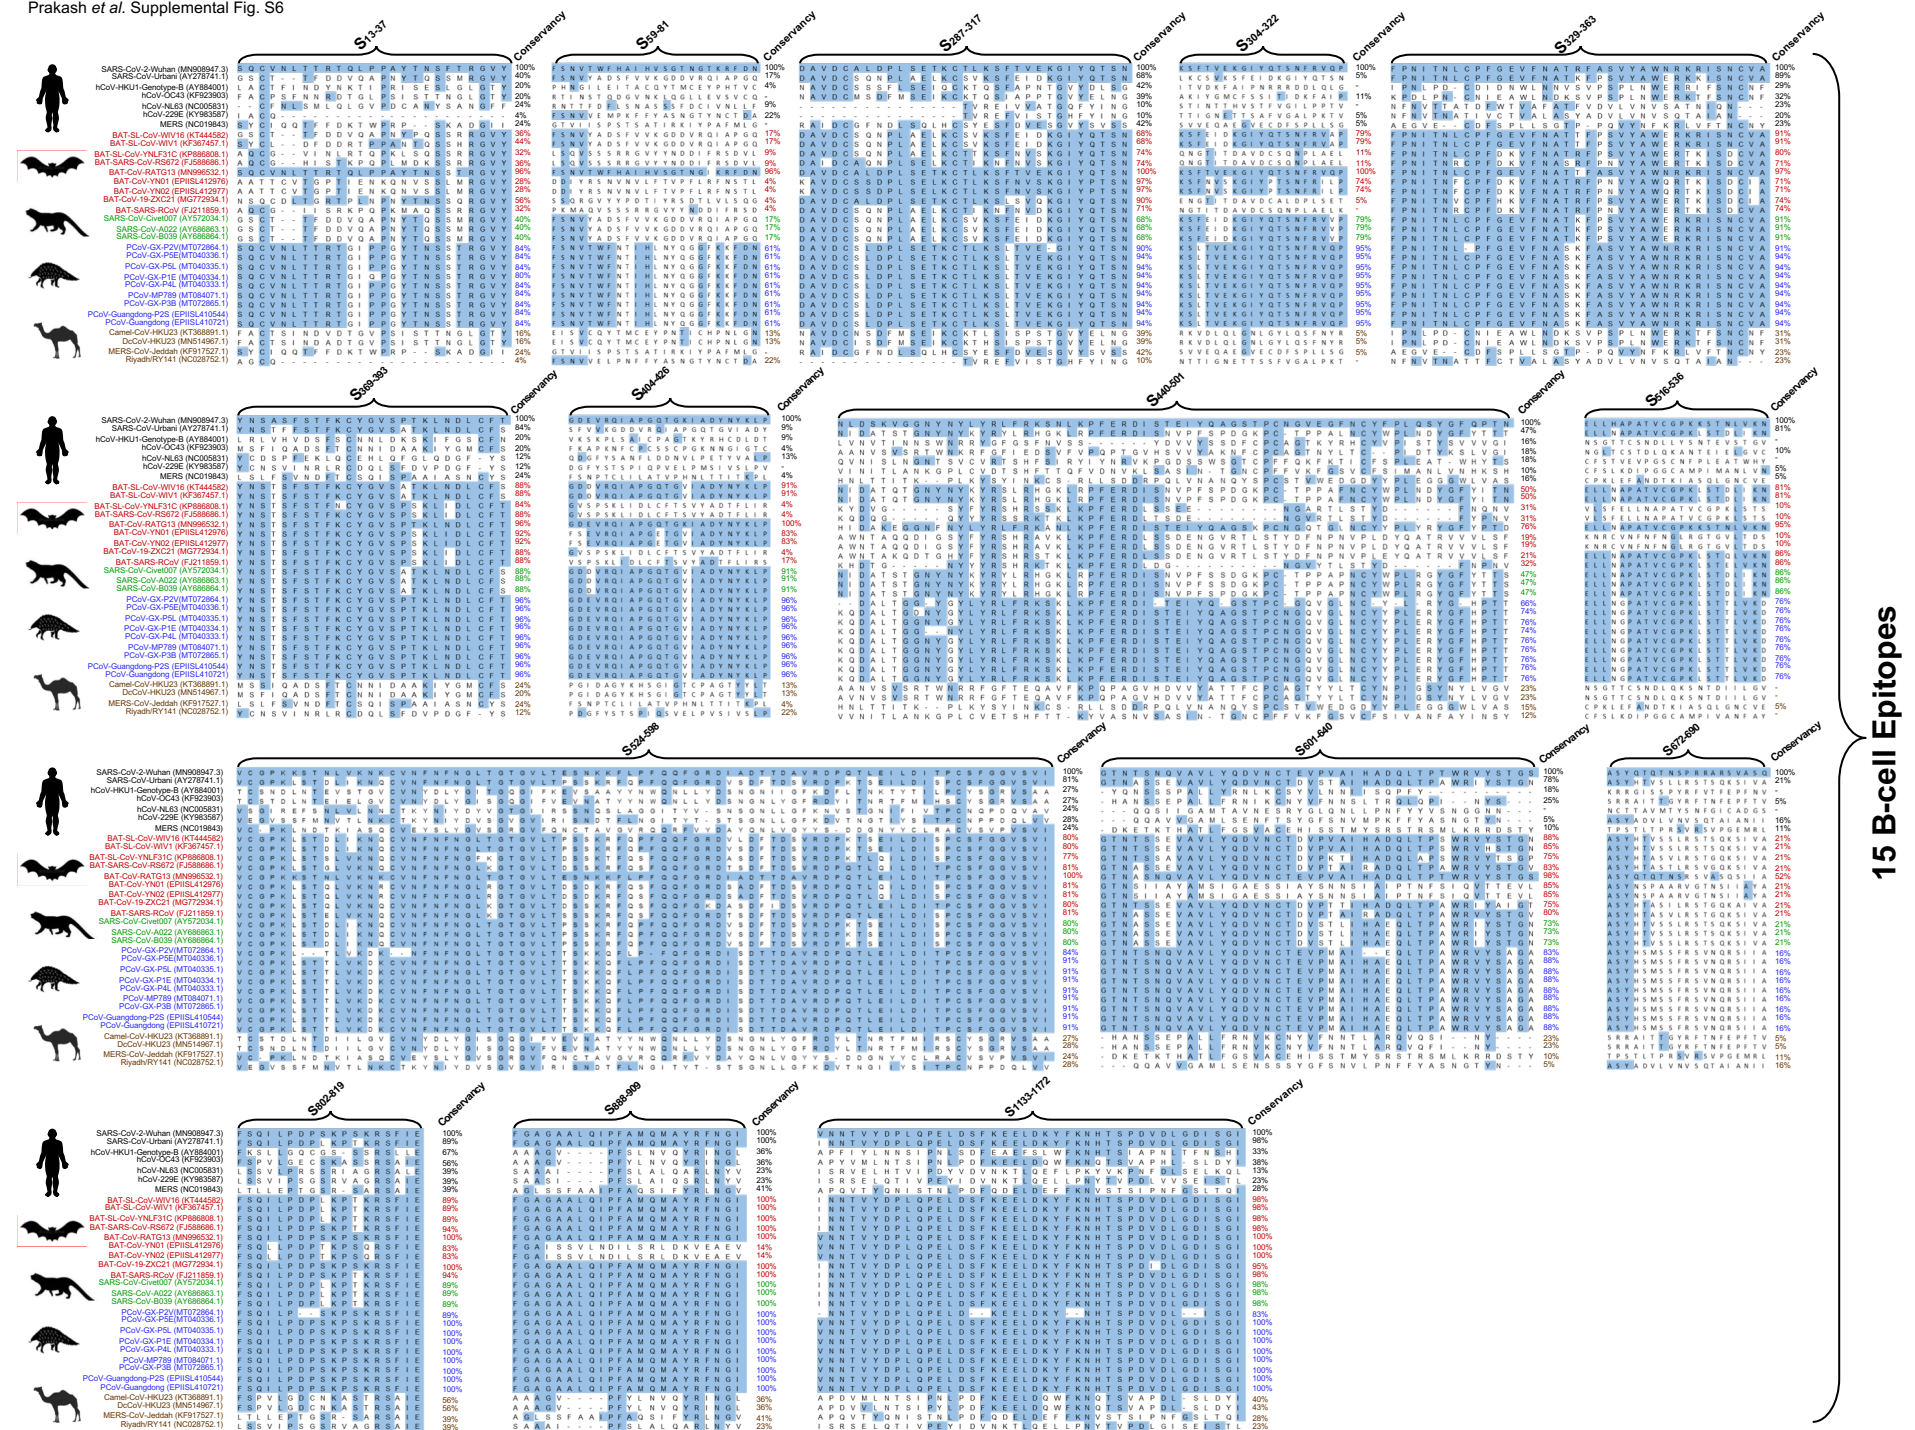

**Supplemental Figure S6: Conservation of Spike-derived B cell epitopes among human, bat, civet cat, pangolin, and camel coronavirus strains:** Multiple sequence alignment performed using ClustalW among 29 strains of SARS coronavirus (SARS-CoV) obtained from human, bat, civet, pangolin, and camel. This includes 7 human SARS/MERS-CoV strains (SARS-CoV-2-Wuhan (MN908947.3), SARS-HCoV-Urbani (AY278741.1), CoV-HKU1-Genotype-B (AY884001), CoV-OC43 (KF923903), CoV-NL63 (NC005831), CoV-229E (KY983587), MERS (NC019843)); 8 bat SARS-CoV strains (BAT-SL-CoV-WIV16 (KT444582), BAT-SL-CoV-WIV16 (KF367457.1), BAT-SL-CoV-YNLF31C (KP886808.1), BAT-SARS-CoV-RS672 (FJ588686.1), BAT-CoV-RATG13 (MN996532.1), BAT-CoV-YN01 (EPIISL412976), BAT-CoV-YN02 (EPIISL412977), BAT-CoV-19-ZXC21 (MG772934.1)); 3 Civet SARS-CoV strains (SARS-CoV-Civet007 (AY572034.1), SARS-CoV-A022 (AY686863.1), SARS-CoV-B039 (AY686864.1)); 9 pangolin SARS-CoV strains (PCoV-GX-P2V(MT072864.1), PCoV-GX-P5E(MT040336.1), PCoV-GX-P5L (MT040335.1), PCoV-GX-P1E (MT040334.1), PCoV-GX-P4L (MT040333.1), PCoV-MP789 (MT084071.1), PCoV-GX-P3B (MT072865.1), PCoV-Guangdong-P2S (EPIISL410544), PCoV-Guangdong (EPIISL410721)); 4 camel SARS-CoV strains (Camel-CoV-HKU23 (KT368891.1), DcCoV-HKU23 (MN514967.1), MERS-CoV-Jeddah (KF917527.1), Riyadh/Ry141 (NC028752.1)) and 1 recombinant strain (FJ211859.1)). Regions highlighted with blue color represent the sequence homology. The B cell epitopes, which showed at least 50% conservancy among two or more strains of the SARS Coronavirus or possess receptor binding domain (RBD) specific amino acids were selected as candidate epitopes.

**A**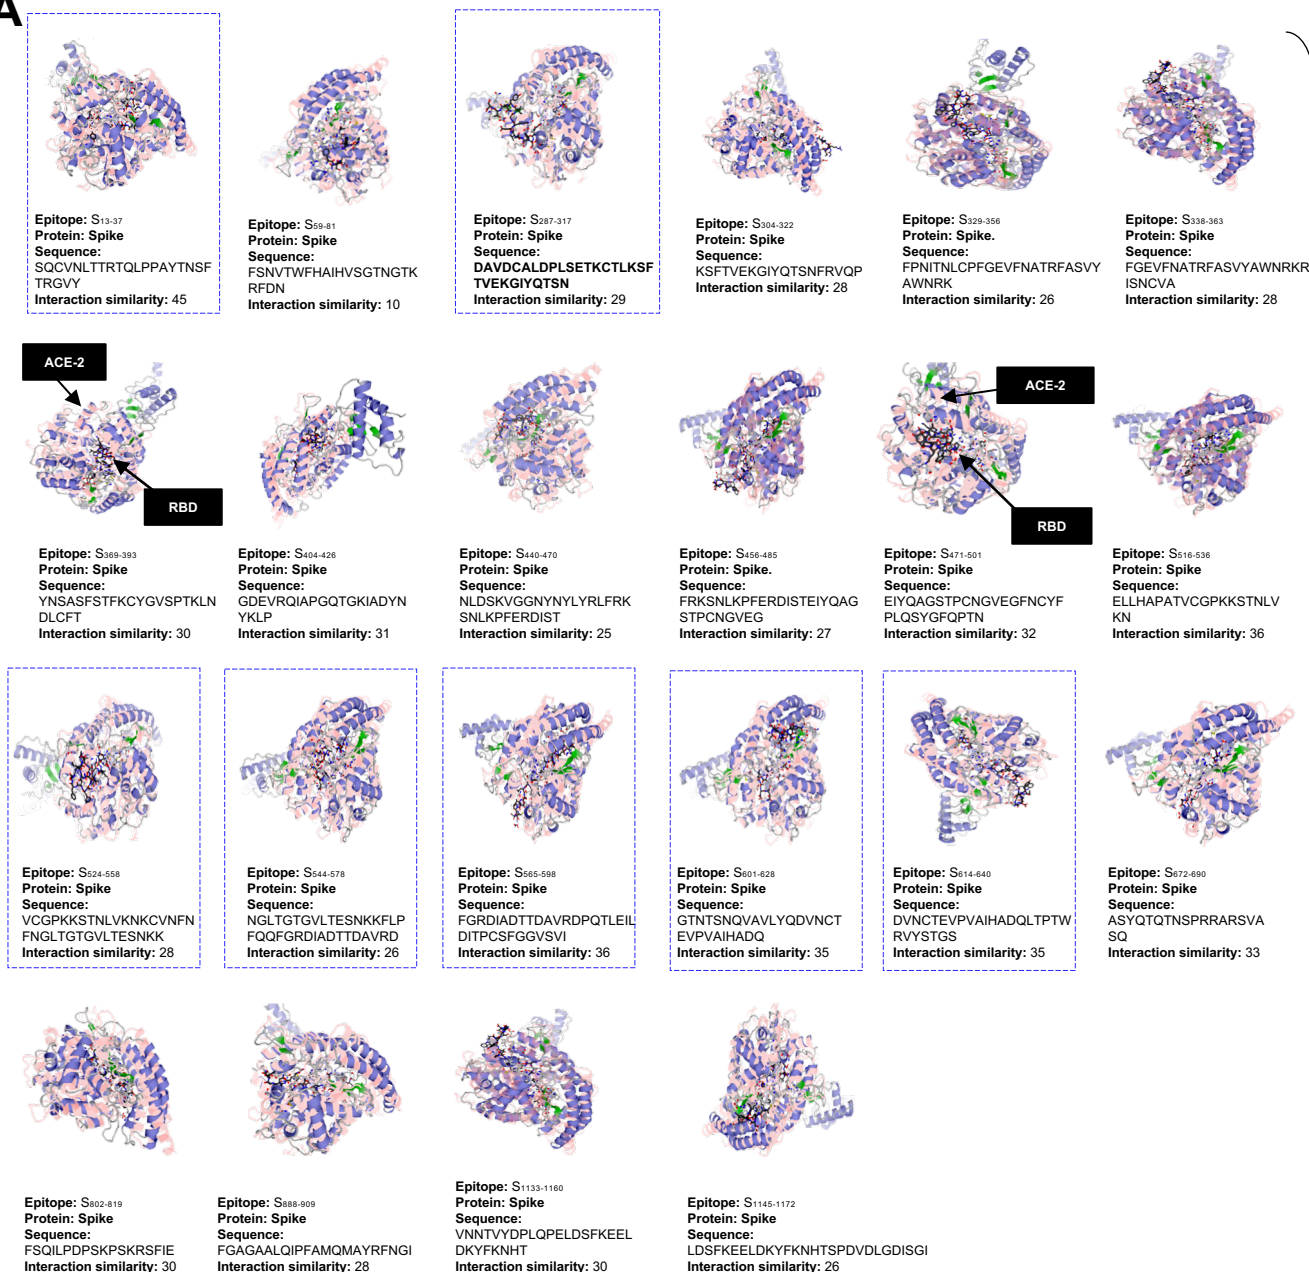

  In blue B cell epitopes included in Pan-Coronavirus vaccine candidate #1

**B**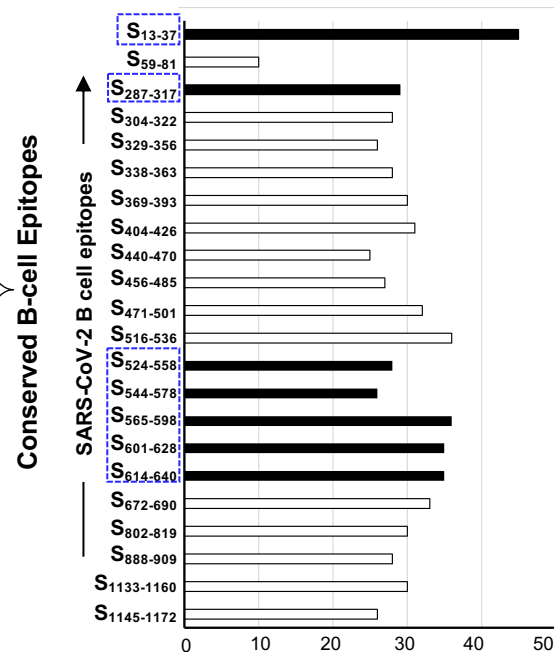

**Supplemental Figure S7: Docking of SARS-CoV-2 Spike glycoprotein-derived B cell epitopes to human ACE2 receptor: (A)** Molecular docking of 22 B-cell epitopes, identified from the SARS-CoV-2 Spike glycoprotein, with ACE2 receptors. B cell epitope peptides are shown in ball and stick structures whereas the ACE2 receptor protein is shown as a template. S<sub>471-501</sub> and S<sub>369-393</sub> peptide epitopes possess receptor binding domain region specific amino acid residues. The prediction accuracy is estimated from a linear model as the relationship between the fraction of correctly predicted binding site residues and the template-target similarity measured by the protein structure similarity score and interaction similarity score ( $S_{Inter}$ ) obtained by linear regression.  $S_{Inter}$  shows the similarity of amino acids of the B-cell peptides aligned to the contacting residues in the amino acids of the ACE2 template structure. Higher  $S_{Inter}$  score represents a more significant binding affinity among the ACE2 molecule and B-cell peptides. **(B)** Summary of the interaction similarity score of 22 B cells specific epitopes observed from the protein-peptide molecular docking analysis. B cell epitopes with high interaction similarity scores are indicated in black.





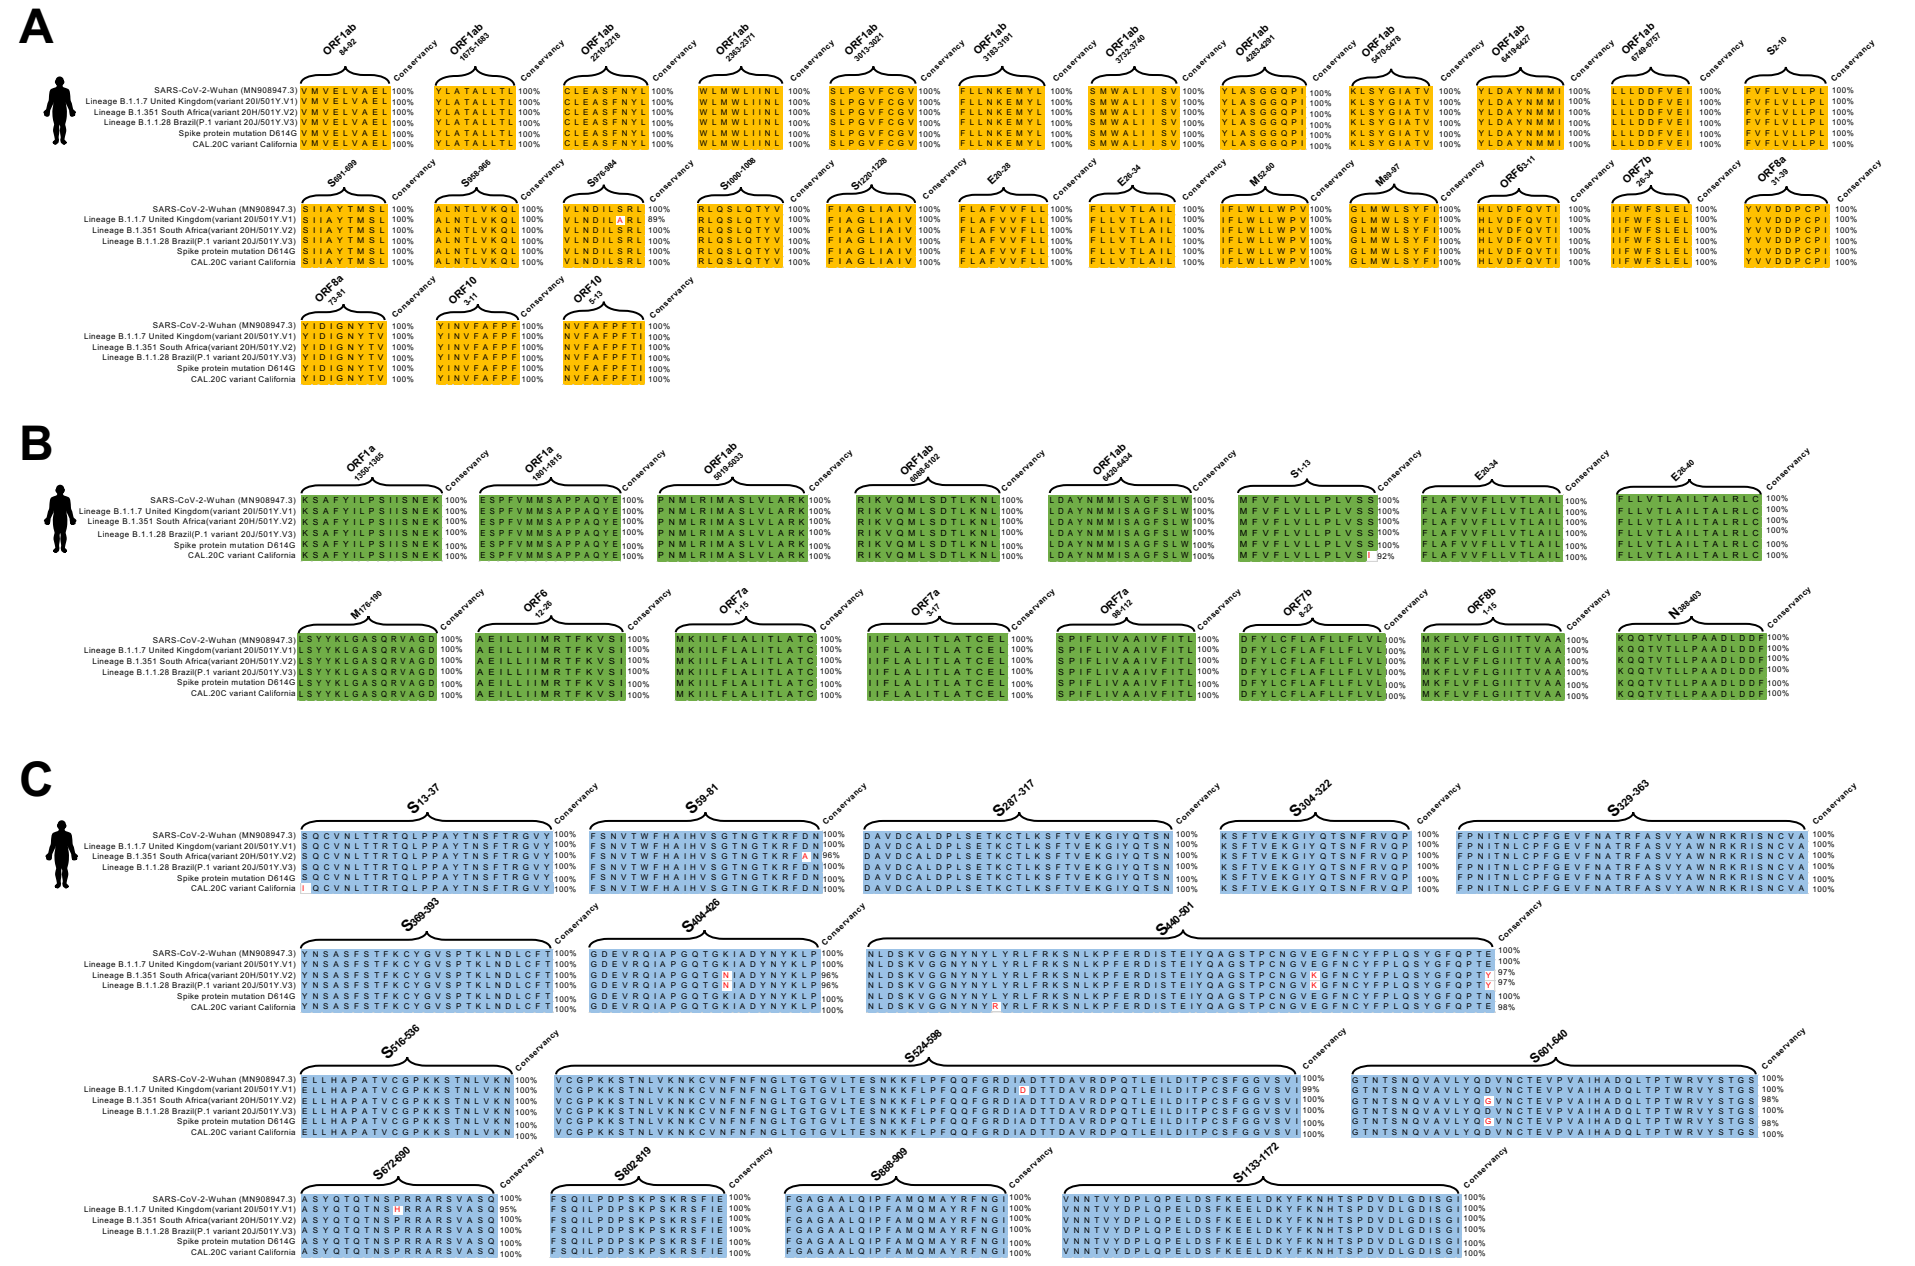

**Supplemental Figure S9: Screening for the CD8<sup>+</sup> T cell, CD4<sup>+</sup> T cell, and B-cell epitopes against highly transmissible variants of SARS-CoV-2:** Keeping in mind the high degree of transmissibility of SARS-CoV-2 variants namely, Lineage B.1.1.7 from United Kingdom (variant 20J/501Y.V1), Lineage B.1.351 from South Africa (variant 20H/501Y.V2), Lineage B.1.1.28 from Brazil (P.1 variant 20J/501Y.V3), CAL.20C variant from California, and Spike protein mutation D614G; it is of importance to evaluate whether our screened epitopes are conserved for these variants or not, which in turn will ascertain the immunogenicity/antigenicity of our candidate epitopes. Results show (A) 26 out of 27 CD8<sup>+</sup> T cell epitopes, and (B) 15 out of 16 CD4<sup>+</sup> T cell epitopes are 100% conserved against all the higher transmissible variants. (C) Similarly, 8 B-cell epitopes showed 100% consensancy against all the highly pathogenic SARS-CoV-2 variants.
